# Supplementary material for: Mono- and bidentate imidates of five-coordinate nickel(ii) with macrocyclic ligands: spectroscopic and photophysical properties
Source: Royal Society of Chemistry journal article supplement (doi:10.1039/c0dt00036a), 2010-01-01
Supplement: c0dt00036a.pdf [file c0dt00036a.pdf]

## Supplementary Information

### **Mono- and bidentate imidates of five-coordinate nickel(II) with macrocyclic ligands: spectroscopic and photophysical properties**

Rocío García-Bueno,<sup>a</sup> M. Dolores Santana,<sup>\*a</sup> Gregorio Sánchez,<sup>a</sup> Joaquín García,<sup>a</sup>  
Gabriel García,<sup>a</sup> José Pérez<sup>b</sup> and Luis García<sup>b</sup>

<sup>a</sup> *Departamento de Química Inorgánica, Universidad de Murcia, E-30071 Murcia,  
Spain. E-mail: [dsl@um.es](mailto:dsl@um.es)*

<sup>b</sup> *Departamento de Ingeniería Minera, Geológica y Cartográfica. Área de Química  
Inorgánica, Universidad Politécnica de Cartagena, E-30203 Cartagena, Spain*

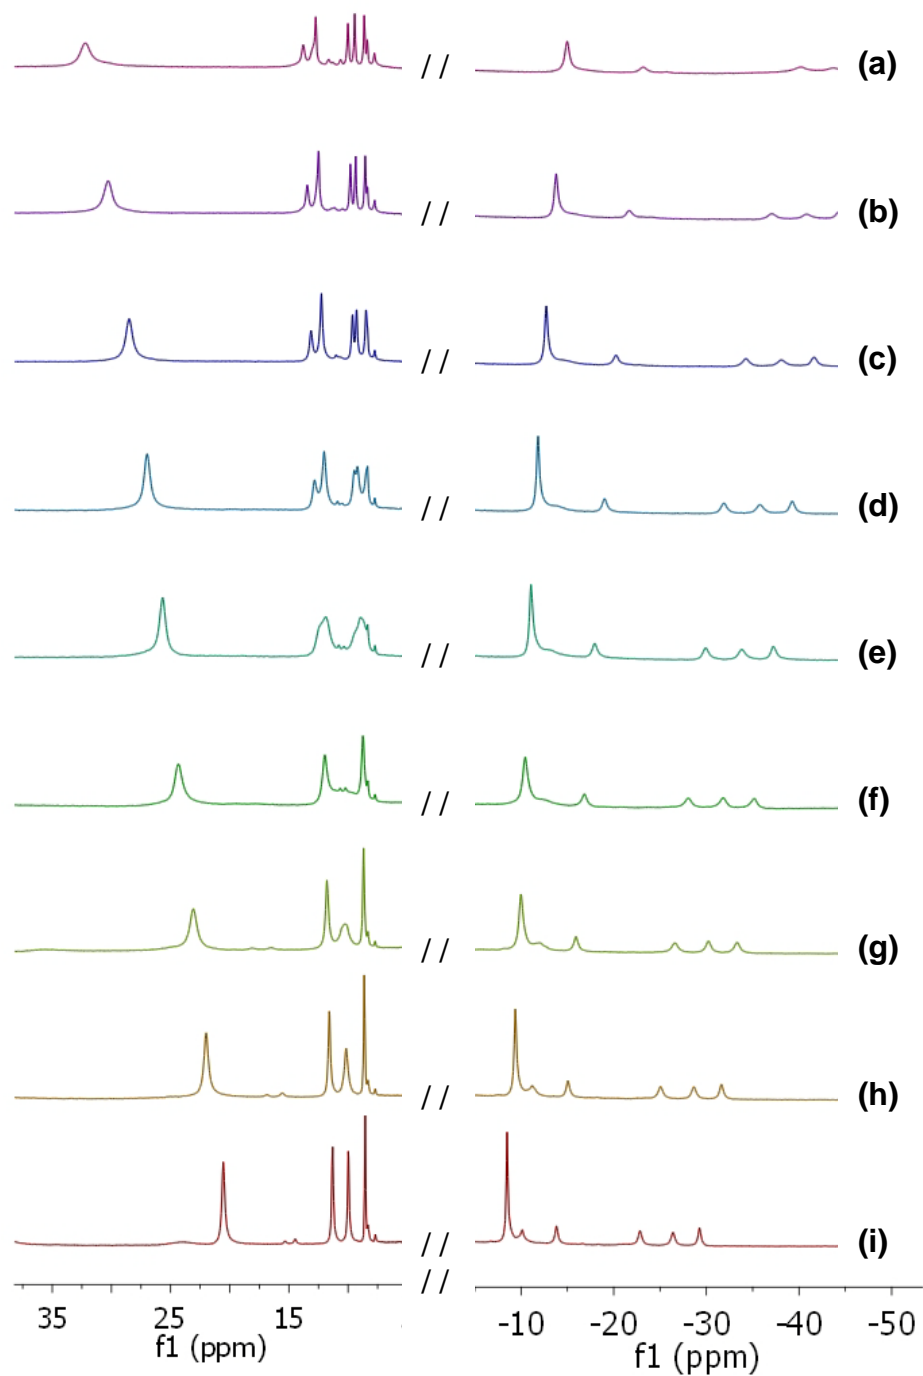

**Figure S1.**  $^1\text{H}$  NMR spectra of **4b** at different temperatures: (a) 213 K, (b) 223, (c) 233, (d) 243, (e) 253, (f) 263, (g) 273, (h) 283, (i) 298. Only the region relevant to the assignment of imidate resonances is shown.

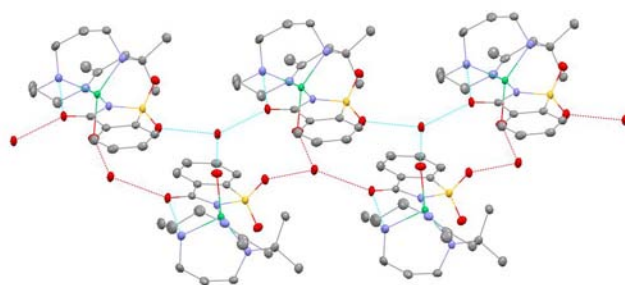

**Figure S2.** Schematic drawing of structure of compound **3a** showing the inter chains hydrogen bonds (dashed line) to yield a 2D-network. Carbon, gray; nitrogen, blue; oxygen, red; nickel, green, sulphur, yellow; hydrogen bonds, red.

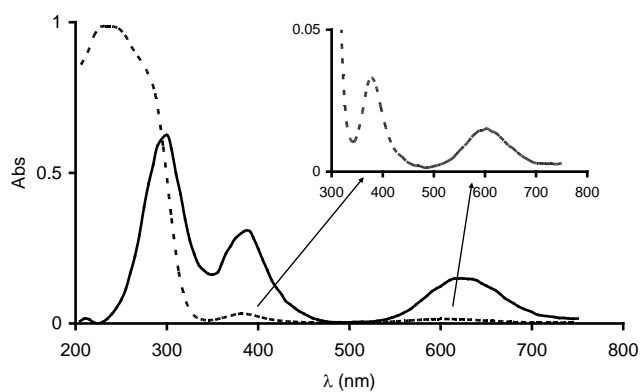

**Figure S3.** UV-visible absorption spectra for complex **3b** in  $10^{-4}$  mol dm $^{-3}$  acetonitrile solution (dotted line) and diffuse-reflectance ultraviolet spectra (DRUV, solid line).
